# Supplementary material for: Characteristics of the Dynamic Electrocardiogram in the Elderly with Nonvalvular Atrial Fibrillation Combined with Long R-R Intervals
Source: Hindawi journal article supplement (doi:10.1155/2021/4485618), 2021-11-10
Supplement: f1 [file 4485618.f1.zip]

# Statistical tables

| Time           | BPH   | HR      |      |         | VP     |       |    |       |      | AP     |       |    |       |   | Long RR interval |        |
|----------------|-------|---------|------|---------|--------|-------|----|-------|------|--------|-------|----|-------|---|------------------|--------|
|                |       | Slowest | Mean | Fastest | Single | pairs | VT | Totle | %    | Single | Pairs | AT | Totle | % |                  | pacing |
| 16:00<br>02-17 | 2274  | 41      | 66   | 106     | 0      | 0     | 0  | 0     | 0    | 0      | 0     | 0  | 0     | 0 | 0                | 8      |
| 17:00          | 3375  | 35      | 56   | 105     | 0      | 0     | 0  | 0     | 0    | 0      | 0     | 0  | 0     | 0 | 0                | 79     |
| 18:00          | 3434  | 37      | 57   | 109     | 1      | 0     | 0  | 1     | <0.1 | 0      | 0     | 0  | 0     | 0 | 0                | 57     |
| 19:00          | 3886  | 47      | 65   | 93      | 0      | 0     | 0  | 0     | 0    | 0      | 0     | 0  | 0     | 0 | 0                | 1      |
| 20:00          | 3977  | 43      | 66   | 120     | 1      | 0     | 0  | 1     | <0.1 | 0      | 0     | 0  | 0     | 0 | 0                | 19     |
| 21:00          | 3349  | 36      | 55   | 105     | 0      | 0     | 0  | 0     | 0    | 0      | 0     | 0  | 0     | 0 | 0                | 65     |
| 22:00          | 3108  | 34      | 51   | 118     | 1      | 0     | 0  | 1     | <0.1 | 0      | 0     | 0  | 0     | 0 | 0                | 135    |
| 23:00          | 2555  | 31      | 43   | 74      | 2      | 0     | 0  | 2     | <0.1 | 0      | 0     | 0  | 0     | 0 | 0                | 285    |
| 00:00<br>02-18 | 2574  | 33      | 43   | 71      | 0      | 0     | 0  | 0     | 0    | 0      | 0     | 0  | 0     | 0 | 0                | 281    |
| 01:00          | 2759  | 35      | 46   | 120     | 0      | 0     | 0  | 0     | 0    | 0      | 0     | 0  | 0     | 0 | 0                | 206    |
| 02:00          | 2593  | 33      | 43   | 83      | 0      | 0     | 0  | 0     | 0    | 0      | 0     | 0  | 0     | 0 | 0                | 256    |
| 03:00          | 2640  | 34      | 44   | 78      | 0      | 0     | 0  | 0     | 0    | 0      | 0     | 0  | 0     | 0 | 0                | 226    |
| 04:00          | 2589  | 33      | 43   | 76      | 1      | 0     | 0  | 1     | <0.1 | 0      | 0     | 0  | 0     | 0 | 0                | 244    |
| 05:00          | 2801  | 31      | 46   | 115     | 3      | 0     | 0  | 3     | 0.1  | 0      | 0     | 0  | 0     | 0 | 0                | 288    |
| 06:00          | 2429  | 31      | 40   | 65      | 1      | 0     | 0  | 1     | <0.1 | 0      | 0     | 0  | 0     | 0 | 0                | 344    |
| 07:00          | 3250  | 33      | 53   | 117     | 1      | 0     | 0  | 1     | <0.1 | 0      | 0     | 0  | 0     | 0 | 0                | 129    |
| 08:00          | 3954  | 39      | 66   | 115     | 2      | 0     | 0  | 2     | <0.1 | 0      | 0     | 0  | 0     | 0 | 0                | 12     |
| 09:00          | 4231  | 49      | 70   | 136     | 0      | 0     | 0  | 0     | 0    | 0      | 0     | 0  | 0     | 0 | 0                | 4      |
| 10:00          | 3853  | 40      | 64   | 113     | 1      | 0     | 0  | 1     | <0.1 | 0      | 0     | 0  | 0     | 0 | 0                | 35     |
| 11:00          | 2885  | 34      | 48   | 92      | 2      | 0     | 0  | 2     | <0.1 | 0      | 0     | 0  | 0     | 0 | 0                | 167    |
| 12:00          | 3506  | 38      | 58   | 104     | 0      | 0     | 0  | 0     | 0    | 0      | 0     | 0  | 0     | 0 | 0                | 53     |
| 13:00          | 2872  | 37      | 48   | 89      | 0      | 0     | 0  | 0     | 0    | 0      | 0     | 0  | 0     | 0 | 0                | 113    |
| 14:00          | 3103  | 40      | 52   | 100     | 0      | 0     | 0  | 0     | 0    | 0      | 0     | 0  | 0     | 0 | 0                | 69     |
| 15:00          | 2310  | 39      | 64   | 112     | 0      | 0     | 0  | 0     | 0    | 0      | 0     | 0  | 0     | 0 | 0                | 13     |
| 总计             | 74307 | 31      | 53   | 136     | 16     | 0     | 0  | 16    | <0.1 | 0      | 0     | 0  | 0     | 0 | 0                | 3089   |
