# Supplementary material for: Characteristics of the Dynamic Electrocardiogram in the Elderly with Nonvalvular Atrial Fibrillation Combined with Long R-R Intervals
Source: Hindawi journal article supplement (doi:10.1155/2021/4485618), 2021-11-10
Supplement: f1 [file 4485618.f1.zip]

Archive with 13 entries (13 files):
- 4485618.f1/SUPPLEMENTARY DESCRIPTION.docx
- 4485618.f1/Supplementary Fig. 1.pdf
- 4485618.f1/Supplementary Fig. 10.pdf
- 4485618.f1/Supplementary Fig. 2.pdf
- 4485618.f1/Supplementary Fig. 3.pdf
- 4485618.f1/Supplementary Fig. 4.pdf
- 4485618.f1/Supplementary Fig. 5.pdf
- 4485618.f1/Supplementary Fig. 6.pdf
- 4485618.f1/Supplementary Fig. 7.pdf
- 4485618.f1/Supplementary Fig. 8.pdf
- 4485618.f1/Supplementary Fig. 9.pdf
- 4485618.f1/Supplementary Table 1.docx
- 4485618.f1/Supplementary Table 2.docx
