# Supplementary material for: Characteristics of the Dynamic Electrocardiogram in the Elderly with Nonvalvular Atrial Fibrillation Combined with Long R-R Intervals
Source: Hindawi journal article supplement (doi:10.1155/2021/4485618), 2021-11-10
Supplement: f1 [file 4485618.f1.zip › 4485618.f1/SUPPLEMENTARY DESCRIPTION.docx]

**SUPPLEMENTARY DESCRIPTION:**

**Supplementary Table 1. Frequency of long R-R intervals in variable time periods in patients with non-valvular atrial fibrillation**

The statistical test used: Kruskal Wallis rank-sum test for independent samples.

**Supplementary Table 2. Frequency of long R-R intervals in variable time periods in patients with non-valvular atrial fibrillation**

The statistical test used: pairwise comparisons using Bonferroni correction.

**Supplementary Fig. 1**. At 2:38 am, long RR intervals of 1.5 and 2.0s appeared after the 4th and 5th atrial fibrillation QRS wave, which was considered as the conducted waves and subsequently recovered

**Supplementary Fig. 2**. At 5:20 am, the heart rate gradually accelerated and a long RR interval of 2.3s appeared after the 7th atrial fibrillation QRS wave, which was considered as the concealed conduction. The rhythm was reformed and conduction was restored, with no discernible sleep and non-sleep phase discrimination

**Supplementary Fig. 3**. NVAF dynamic electrocardiogram recorded long R-R intervals (asystole) that occurred only during nocturnal sleep periods and not during daytime. Increased vagal tone was considered as the underlying mechanism.

**Supplementary Fig. 4**. Persistent atrial fibrillation with a 24-h mean heart rate of 53 /min, all occurring with long R-R (asystole) and apparent at night. Increased vagal tone and /or concealed or interfered atrioventricular node conduction were considered as the possible underlying mechanism. This observation was also frequent during the daytime, suggesting concealed conduction with interfered and/or combined conduction block in the atrioventricular node.

**Supplementary Fig. 5**. At 10:53, a long R-R of 5.7s was observed after the discontinuation of atrial fibrillation, and the first QRS wave that appeared subsequently was a junctional escape beat. Following that, sinus rhythm recovered with long R-R intervals, suggesting that the “overdrive suppression” in atrial fibrillation renders the sinus node more suppressed or dysfunctional.

**Supplementary Fig. 6**. At 10:24, a long R-R of 4.07s was observed after the discontinuation of atrial fibrillation, with “overdrive suppression” considered as the possible mechanism. The first QRS that appeared subsequently was a sinus rhythm, followed by atrial premature beats with differential conduction and in the form of a complete right bundle branch block waveform. According to the law of bigeminy, atrial premature beats recurred thereafter but did not propagate inferiorly, leading to a reoccurrence of the long R-R of 1.53s and to a concealed conduction, resulting in an abnormal disconnection of the penultimate QRS.

**Supplementary Fig. 7**. At 12:45, the termination of atrial fibrillation with one premature ventricular beat after a junctional escape beat resulted in a long RR interval, with atrioventricular junctional extra-systolic action considered as the possible underlying mechanism. The premature ventricular beats produced the results of complete compensatory intermittent and concealed conduction. The QRS wave before restoring to sinus rhythm was a junctional escape, suggesting sinus node suppression and dysfunction.

**Supplementary Fig. 8**. At 5:01, the patient reverted to atrial fibrillation that was preceded by an II° type I atrioventricular block with a long R-R > 2s of more than three beats, which was not associated with sleep. The patient was diagnosed with atrial fibrillation combined with II° atrioventricular block, given the average ventricular rate at onset was less than 40 bpm.

.

**Supplementary Fig. 9**. At 5:01, the patient was in sinus rhythm with II° AVB and high AVB (same patient in Supplementary Fig. 8).

**Supplementary Fig. 10**. At 11:00, slow-type atrial fibrillation with a mean ventricular rate of less than 40 bpm was observed. Atrial fibrillation was associated with long R-R intervals of > 2s for more than 3 beats, independent of sleep. This was considered as atrial fibrillation with II° AVB (same patient in Supplementary Fig. 8).
