# Supplementary material for: Characteristics of the Dynamic Electrocardiogram in the Elderly with Nonvalvular Atrial Fibrillation Combined with Long R-R Intervals
Source: Hindawi journal article supplement (doi:10.1155/2021/4485618), 2021-11-10
Supplement: f1 [file 4485618.f1.zip › 4485618.f1/Supplementary Fig. 3.pdf]

| Time  | BPH    | HR      |      |         | VP     |       |    |       |      | AP     |       |    |       |   | Long R-R interval |        |
|-------|--------|---------|------|---------|--------|-------|----|-------|------|--------|-------|----|-------|---|-------------------|--------|
|       |        | Slowest | Mean | Fastest | Single | pairs | VT | Totle | %    | Single | Pairs | AT | Totle | % |                   | pacing |
| 11:00 | 1782   | 80      | 95   | 110     | 0      | 0     | 0  | 0     | 0    | 9      | 0     | 0  | 9     | 0 | 0                 |        |
| 09-12 |        |         |      |         |        |       |    |       |      |        |       |    |       |   |                   |        |
| 12:00 | 4752   | 63      | 79   | 104     | 0      | 0     | 0  | 0     | 0    | 69     | 0     | 0  | 69    | 0 | 0                 |        |
| 13:00 | 4607   | 63      | 77   | 122     | 0      | 0     | 0  | 0     | 0    | 130    | 7     | 0  | 144   | 0 | 0                 |        |
| 14:00 | 4789   | 64      | 80   | 122     | 0      | 0     | 0  | 0     | 0    | 323    | 2     | 0  | 327   | 0 | 0                 |        |
| 15:00 | 4833   | 68      | 80   | 109     | 0      | 0     | 0  | 0     | 0    | 190    | 1     | 0  | 192   | 0 | 0                 |        |
| 16:00 | 5589   | 69      | 93   | 137     | 0      | 0     | 0  | 0     | 0    | 153    | 3     | 0  | 159   | 0 | 0                 |        |
| 17:00 | 5074   | 64      | 84   | 114     | 0      | 0     | 0  | 0     | 0    | 78     | 1     | 0  | 80    | 0 | 0                 |        |
| 18:00 | 5144   | 65      | 86   | 151     | 0      | 0     | 0  | 0     | 0    | 49     | 3     | 1  | 58    | 0 | 0                 |        |
| 19:00 | 5199   | 70      | 87   | 126     | 3      | 0     | 0  | 3     | <0.1 | 179    | 2     | 0  | 183   | 0 | 0                 |        |
| 20:00 | 4555   | 63      | 76   | 103     | 2      | 1     | 0  | 4     | <0.1 | 53     | 0     | 0  | 53    | 0 | 0                 |        |
| 21:00 | 4306   | 59      | 72   | 99      | 0      | 0     | 0  | 0     | 0    | 41     | 1     | 3  | 53    | 0 | 0                 |        |
| 22:00 | 4336   | 51      | 72   | 109     | 0      | 0     | 0  | 0     | 0    | 0      | 0     | 0  | 0     | 0 | 5                 |        |
| 23:00 | 4883   | 51      | 81   | 161     | 0      | 0     | 0  | 0     | 0    | 0      | 0     | 0  | 0     | 0 | 4                 |        |
| 00:00 | 4141   | 47      | 69   | 127     | 0      | 0     | 0  | 0     | 0    | 0      | 0     | 0  | 0     | 0 | 10                |        |
| 09-13 |        |         |      |         |        |       |    |       |      |        |       |    |       |   |                   |        |
| 01:00 | 3936   | 43      | 65   | 114     | 0      | 0     | 0  | 0     | 0    | 0      | 0     | 0  | 0     | 0 | 23                |        |
| 02:00 | 4199   | 46      | 70   | 134     | 0      | 0     | 0  | 0     | 0    | 0      | 0     | 0  | 0     | 0 | 11                |        |
| 03:00 | 3853   | 43      | 64   | 103     | 0      | 0     | 0  | 0     | 0    | 0      | 0     | 0  | 0     | 0 | 24                |        |
| 04:00 | 3526   | 40      | 59   | 92      | 0      | 0     | 0  | 0     | 0    | 0      | 0     | 0  | 0     | 0 | 50                |        |
| 05:00 | 4024   | 46      | 67   | 121     | 0      | 0     | 0  | 0     | 0    | 0      | 0     | 0  | 0     | 0 | 17                |        |
| 06:00 | 4744   | 52      | 79   | 149     | 0      | 0     | 0  | 0     | 0    | 0      | 0     | 0  | 0     | 0 | 5                 |        |
| 07:00 | 4594   | 53      | 77   | 115     | 0      | 0     | 0  | 0     | 0    | 0      | 0     | 0  | 0     | 0 | 3                 |        |
| 08:00 | 5989   | 57      | 100  | 188     | 0      | 0     | 0  | 0     | 0    | 0      | 0     | 0  | 0     | 0 | 0                 |        |
| 09:00 | 7670   | 77      | 128  | 195     | 0      | 0     | 0  | 0     | 0    | 0      | 0     | 0  | 0     | 0 | 0                 |        |
| 10:00 | 6238   | 79      | 120  | 205     | 1      | 0     | 0  | 1     | <0.1 | 6      | 1     | 0  | 8     | 0 | 0                 |        |
| 总计    | 112763 | 40      | 81   | 205     | 6      | 1     | 0  | 8     | <0.1 | 1280   | 21    | 4  | 1335  | 0 | 152               |        |
