# Supplementary material for: Characteristics of the Dynamic Electrocardiogram in the Elderly with Nonvalvular Atrial Fibrillation Combined with Long R-R Intervals
Source: Hindawi journal article supplement (doi:10.1155/2021/4485618), 2021-11-10
Supplement: f1 [file 4485618.f1.zip › 4485618.f1/Supplementary Table 1.docx]

**Supplementary Table 1. Frequency of long R-R intervals in variable time periods in patients with non-valvular atrial fibrillation**

| Time | n | P50(P25, P75) | P-value |
| --- | --- | --- | --- |
|  |  |  | <0.001 |
| Midnight - 6 a.m. | 215 | 33(7, 189) |  |
| 7 a.m. - noon | 102 | 96.5(11, 372) |  |
| 13 p.m. - 18 p.m. | 105 | 113(16, 426) |  |
| 19 p.m. - 23 p.m. | 117 | 113(17, 365) |  |
