# Supplementary material for: Characteristics of the Dynamic Electrocardiogram in the Elderly with Nonvalvular Atrial Fibrillation Combined with Long R-R Intervals
Source: Hindawi journal article supplement (doi:10.1155/2021/4485618), 2021-11-10
Supplement: f1 [file 4485618.f1.zip › 4485618.f1/Supplementary Table 2.docx]

**Supplementary Table 2. Frequency of long R-R intervals in variable time periods in patients with non-valvular atrial fibrillation**

| Midnight - 6 a.m. vs. 7 a.m. - noon | P=0.015 |
| --- | --- |
| Midnight - 6 a.m. vs. 13 p.m. - 18 p.m. | P=0.005 |
| Midnight - 6 a.m. vs. 19 p.m. - 23 p.m. | P=0.002 |
