# Supplementary figures and images for: Characteristics of the Dynamic Electrocardiogram in the Elderly with Nonvalvular Atrial Fibrillation Combined with Long R-R Intervals
Source: Hindawi journal article supplement (doi:10.1155/2021/4485618), 2021-11-10

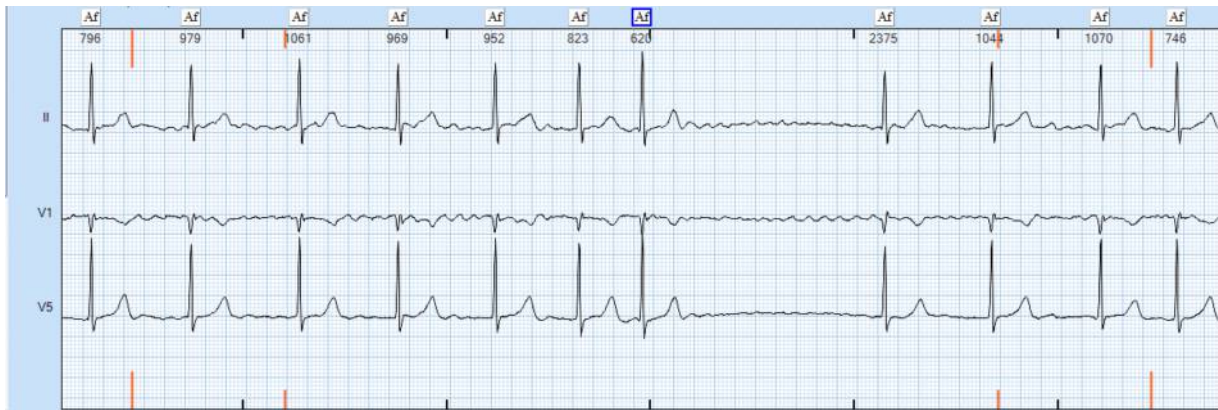

Supplement: f1 [file 4485618.f1.zip]

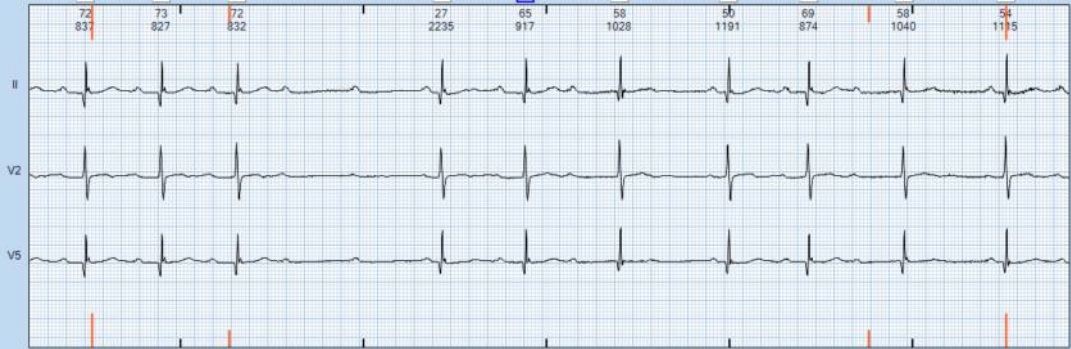

Supplement: f1 [file 4485618.f1.zip]

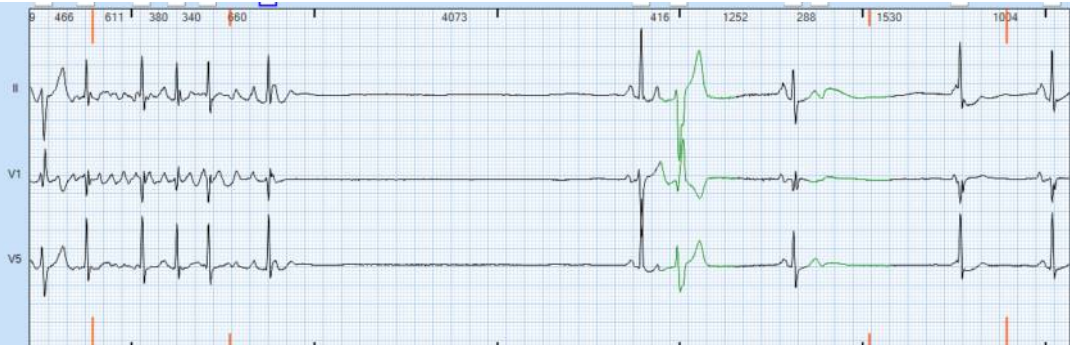

Supplement: f1 [file 4485618.f1.zip]

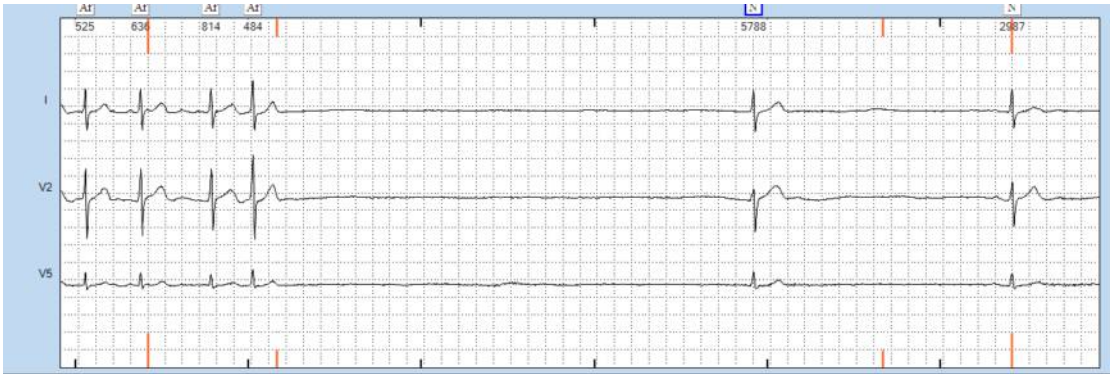

Supplement: f1 [file 4485618.f1.zip]

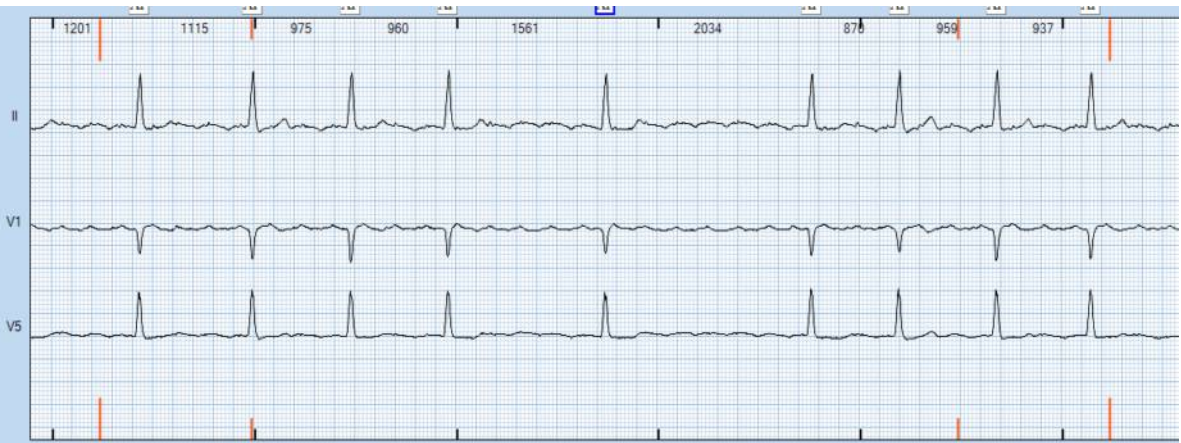

Supplement: f1 [file 4485618.f1.zip › 4485618.f1/Supplementary Fig. 1.pdf]

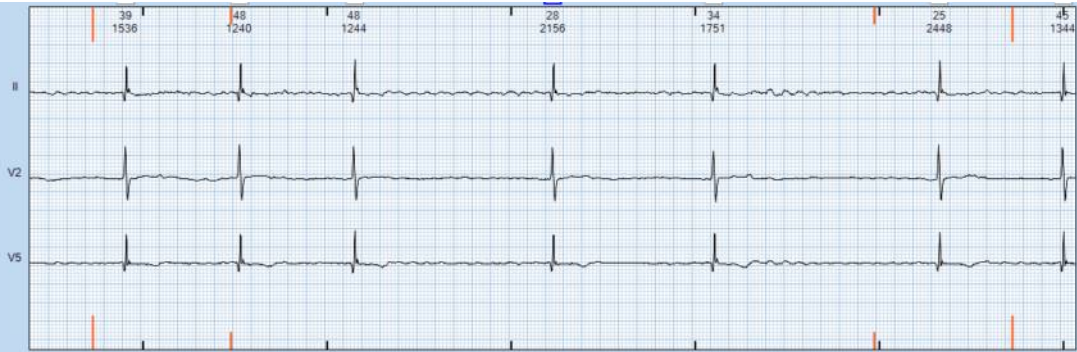

Supplement: f1 [file 4485618.f1.zip › 4485618.f1/Supplementary Fig. 10.pdf]

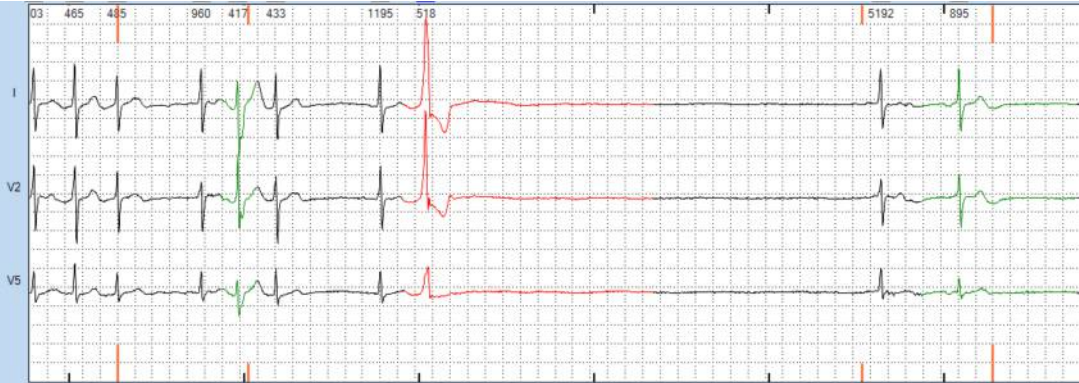

Supplement: f1 [file 4485618.f1.zip › 4485618.f1/Supplementary Fig. 7.pdf]

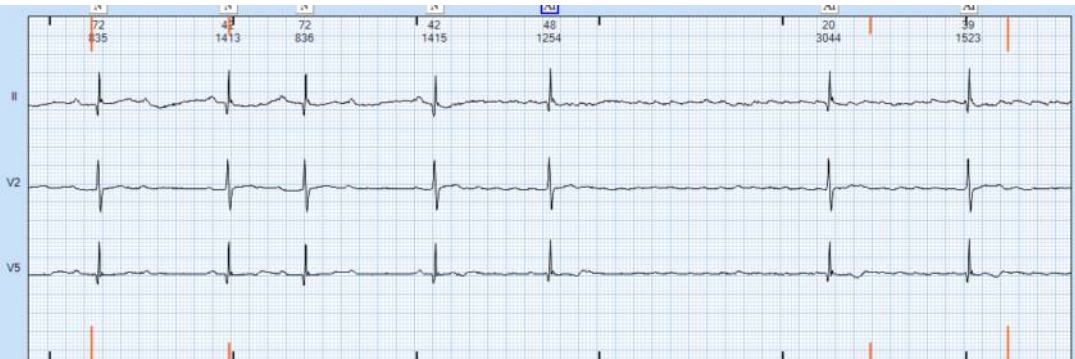

Supplement: f1 [file 4485618.f1.zip › 4485618.f1/Supplementary Fig. 8.pdf]
